# Supplementary material for: Insulin signaling and glucose metabolism in different hepatoma cell lines deviate from hepatocyte physiology toward a convergent aberrant phenotype
Source: PubMed Central journal article supplement (PMC7374613; doi:10.1038/s41598-020-68721-9), 2020-07-21

# **Insulin Signaling and Glucose Metabolism in Different Hepatoma Cell Lines Deviate from Hepatocyte Physiology Toward a Convergent Aberrant Phenotype**

Angela Molinaro<sup>1</sup>, Barbara Becattini<sup>1</sup>, Giovanni Solinas<sup>1\*</sup>

1) The Wallenberg Laboratory and Sahlgrenska Center for Cardiovascular and Metabolic Research, Department of Molecular and Clinical Medicine, Institute of Medicine, University of Gothenburg, Gothenburg, Sweden.

\* Corresponding author. E-mail: [Giovanni.Solinas@wlab.gu.se](mailto:Giovanni.Solinas@wlab.gu.se)

**Supplementary materials: unprocessed full blots**

**Figure 1A**

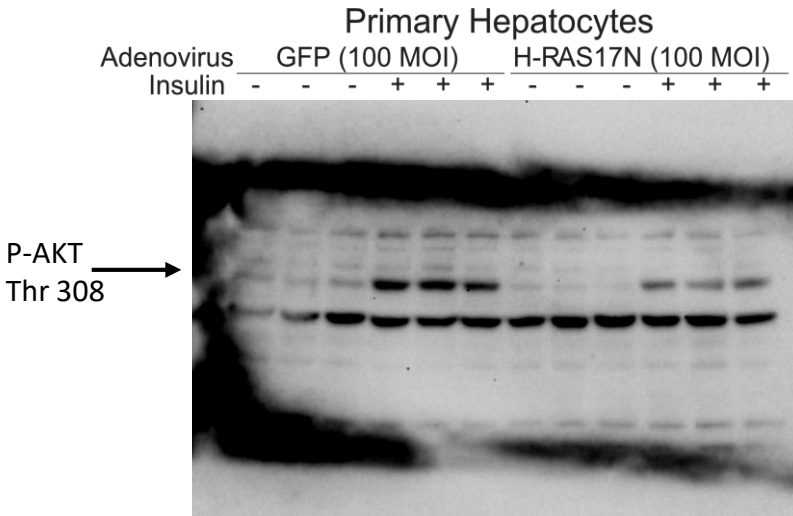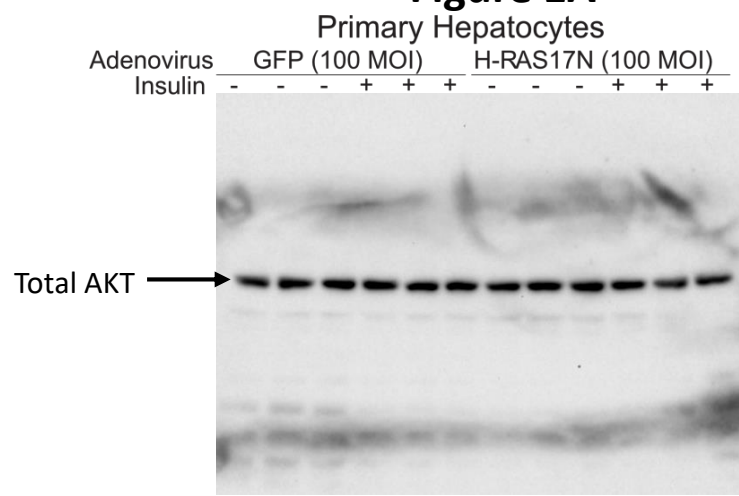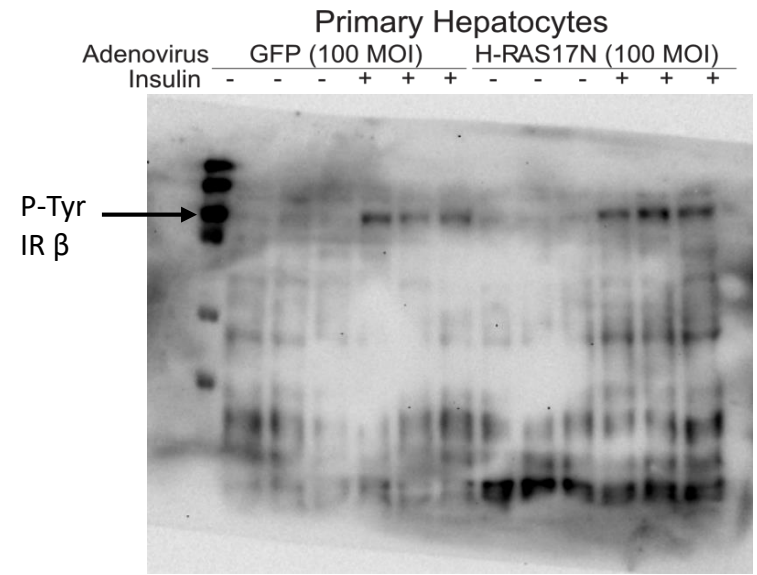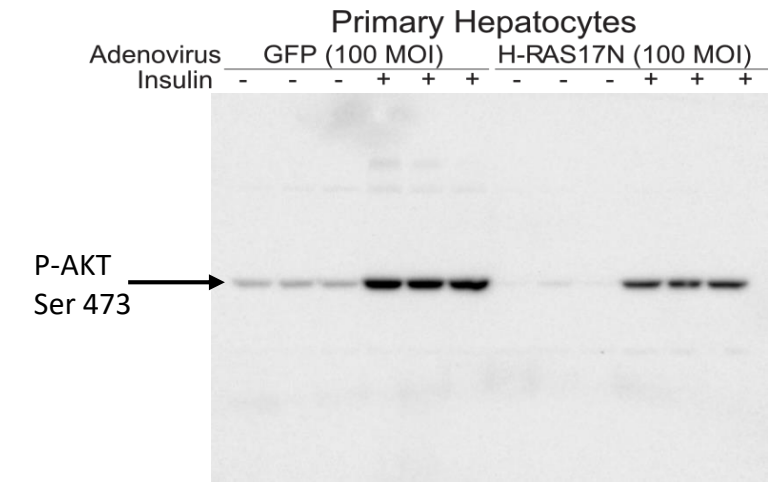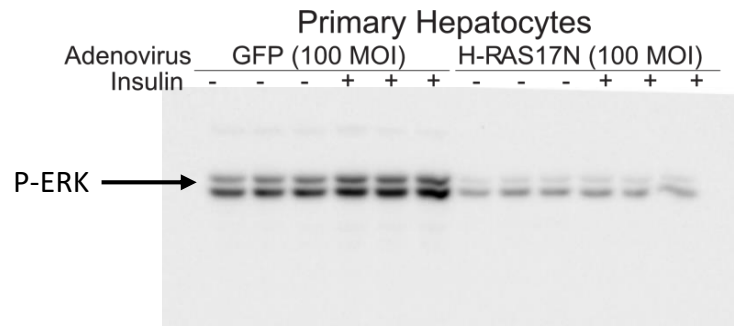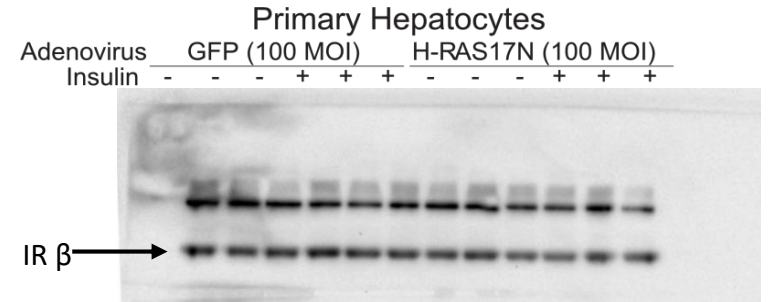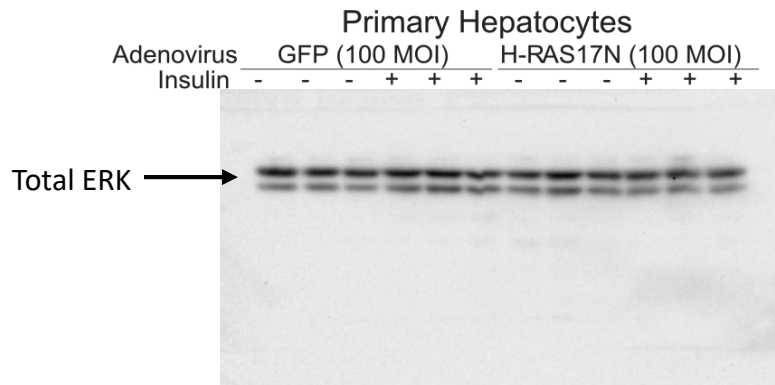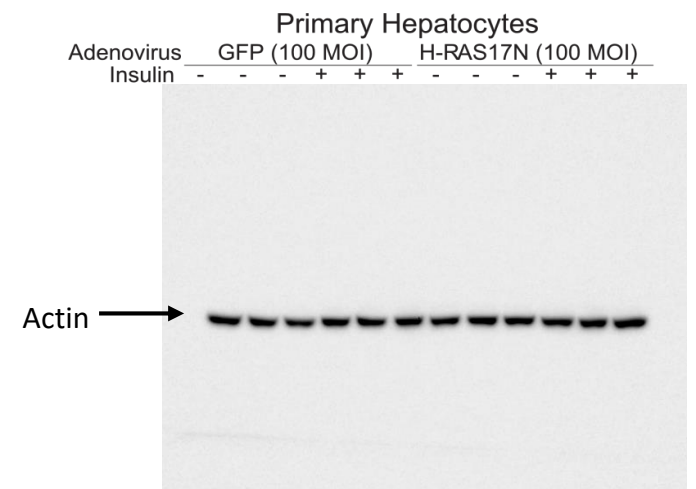

**Figure 1C**

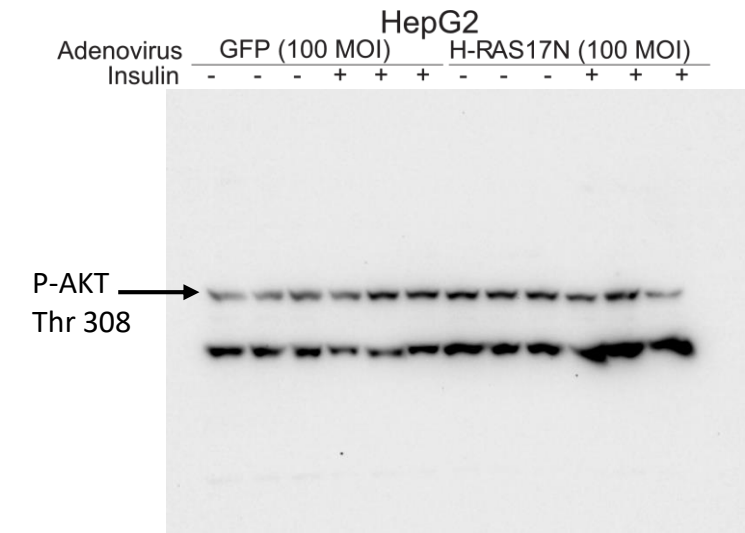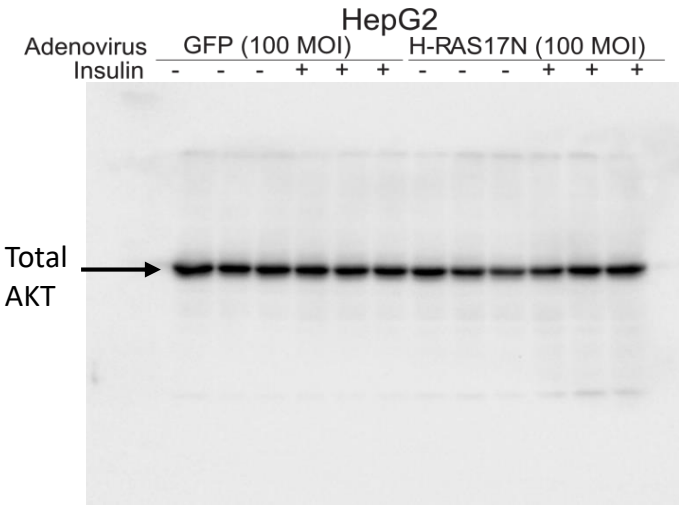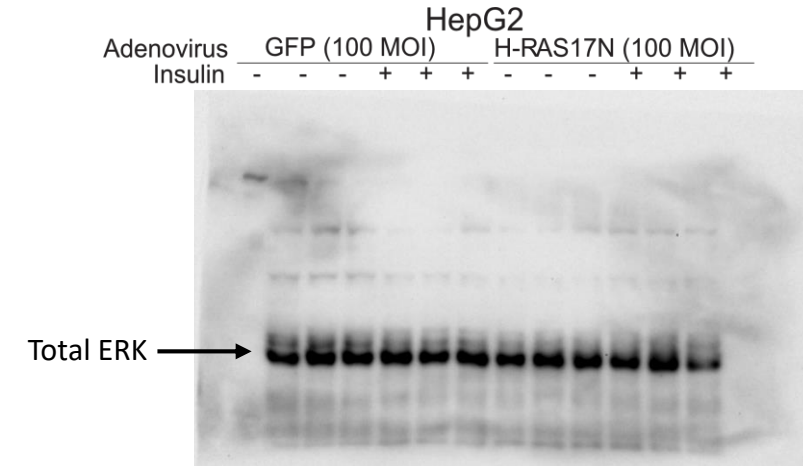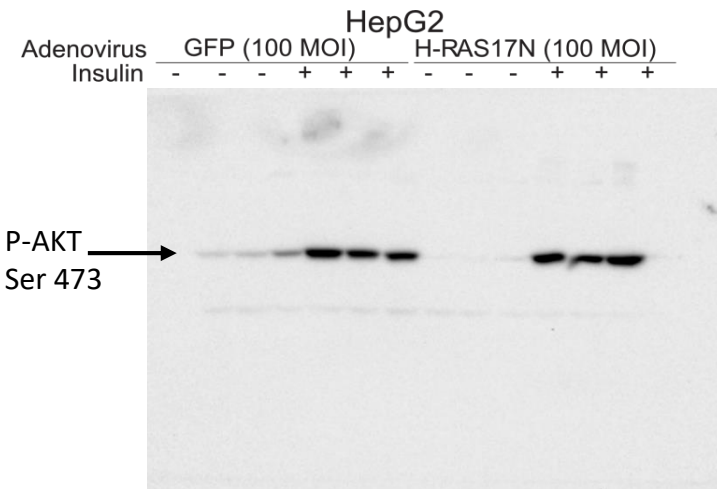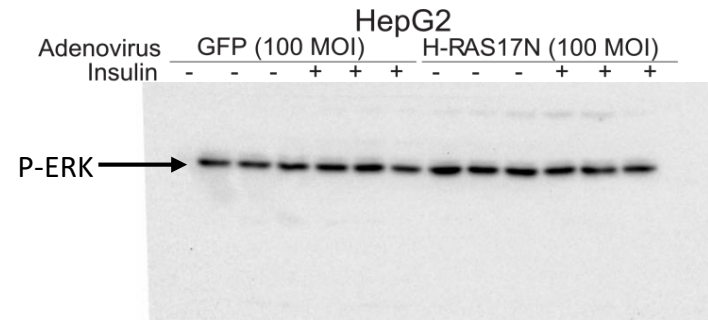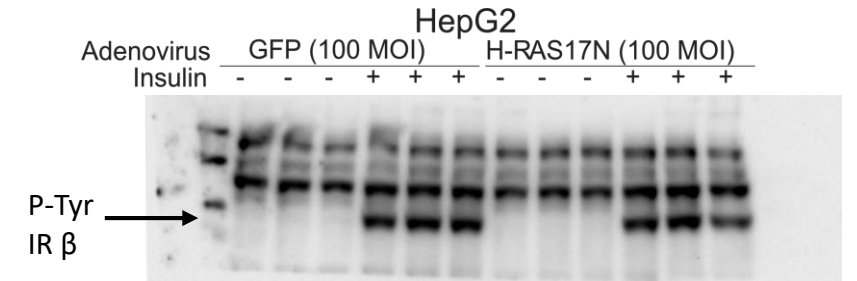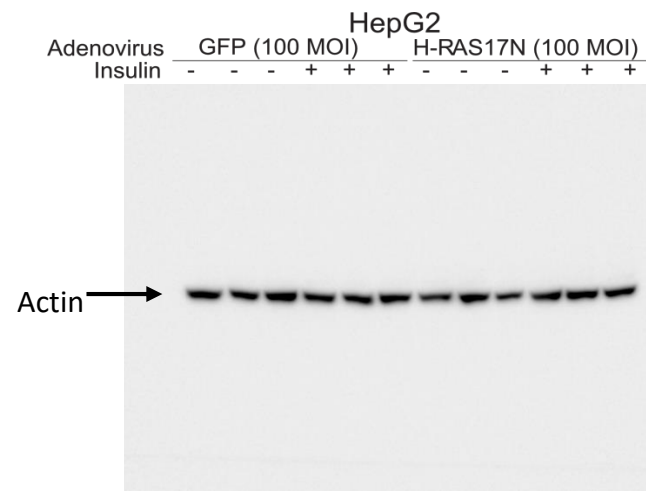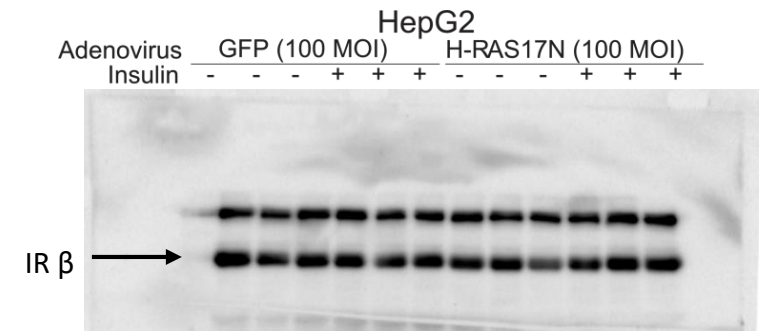

# Figure 2A

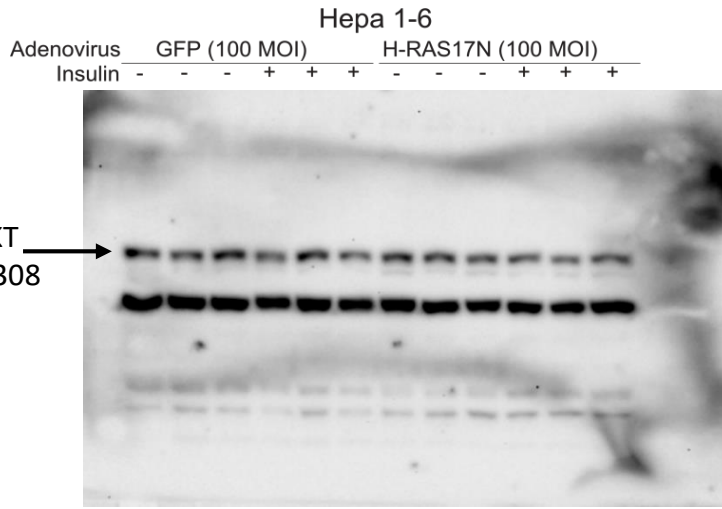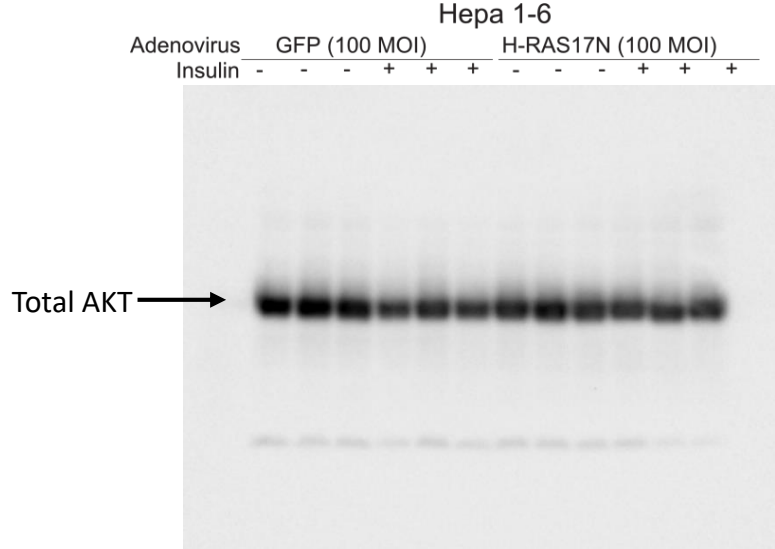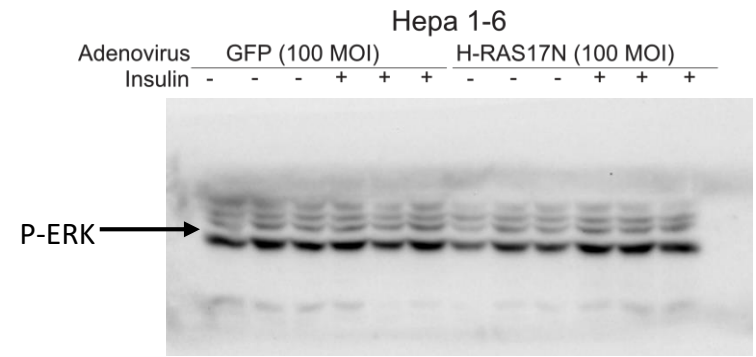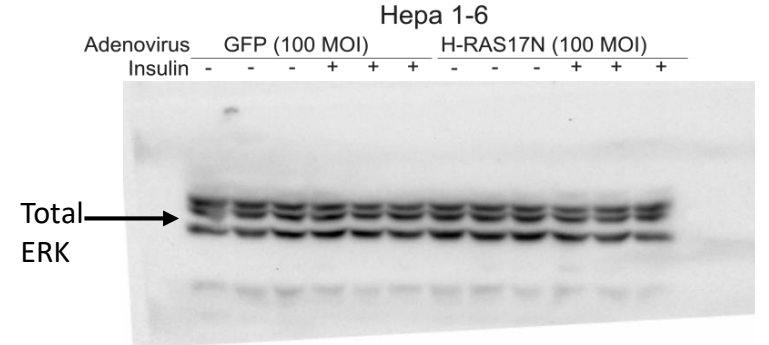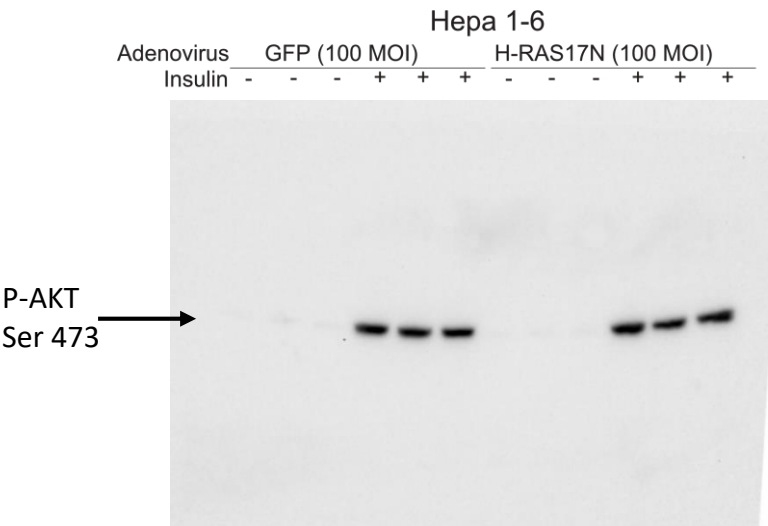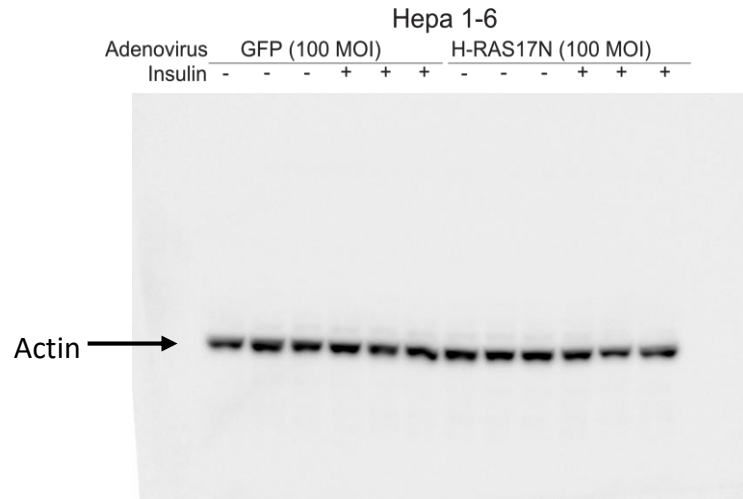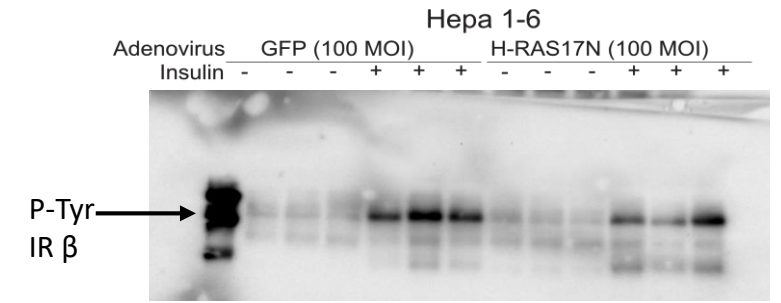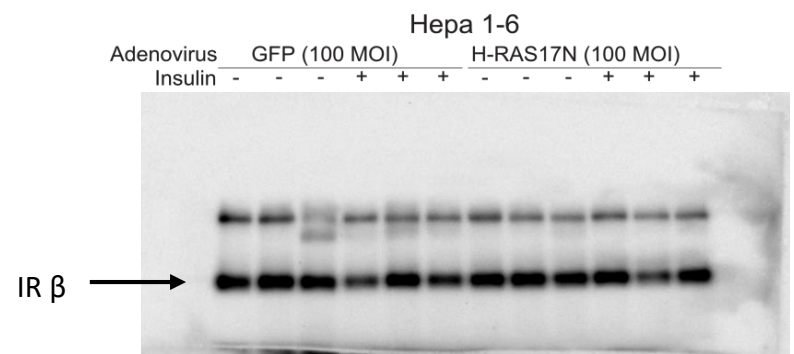

**Figure 2C**

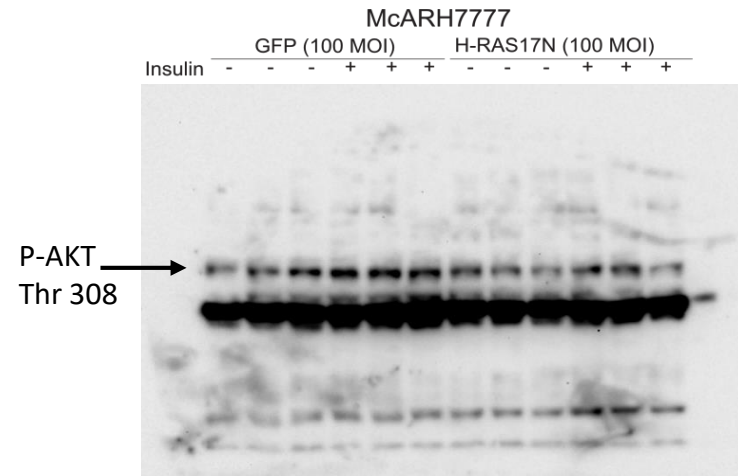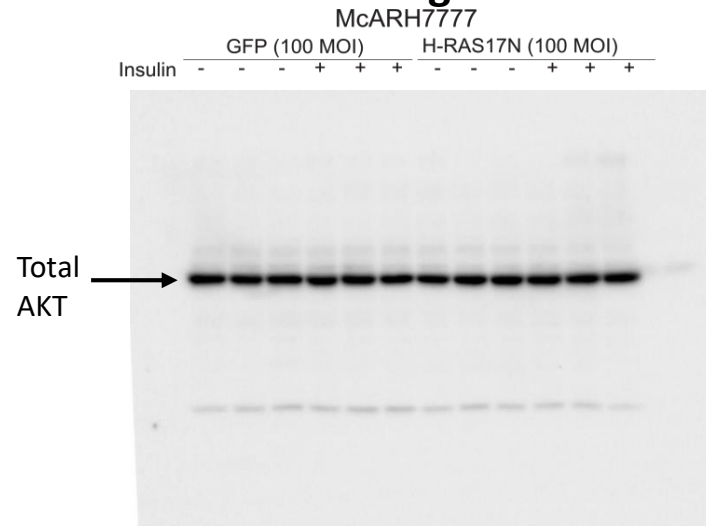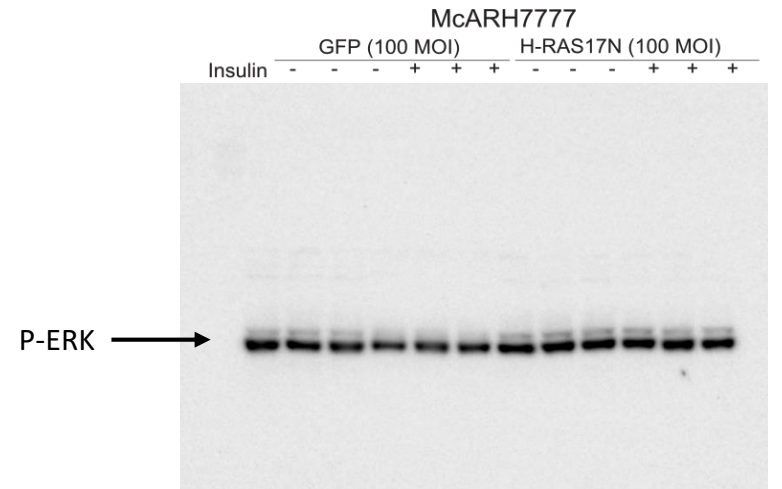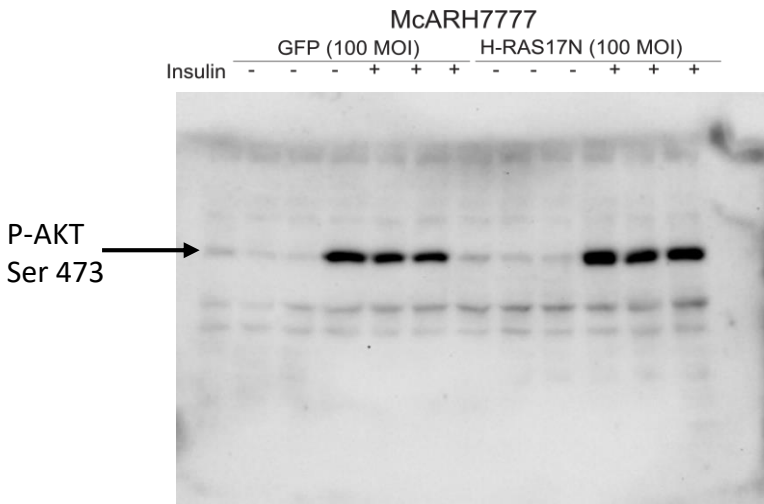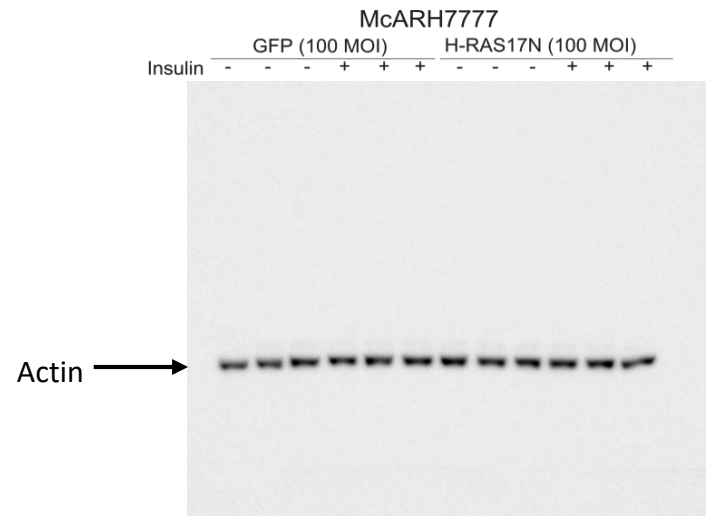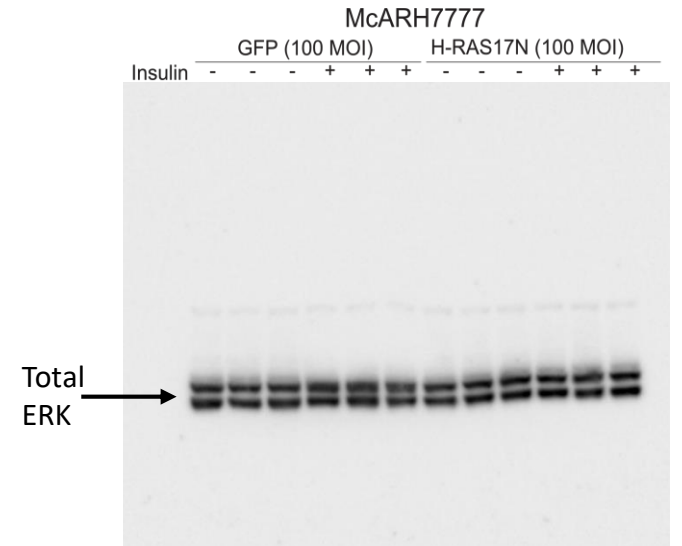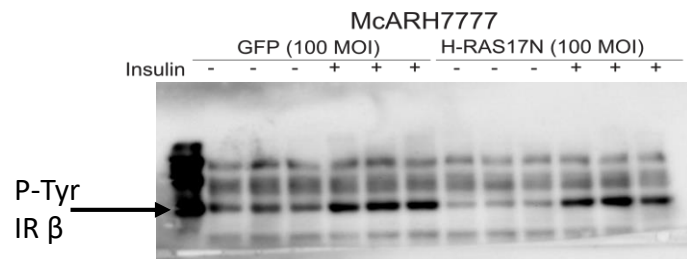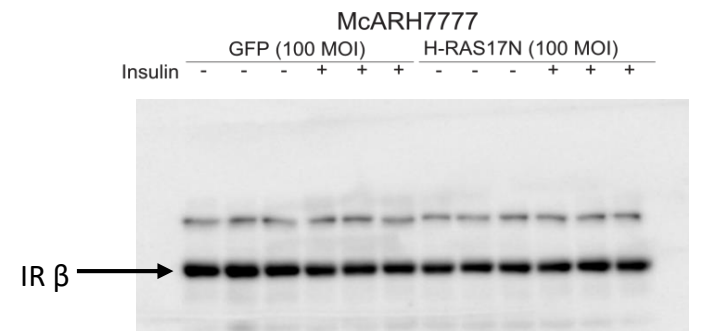



**Figure 3F**

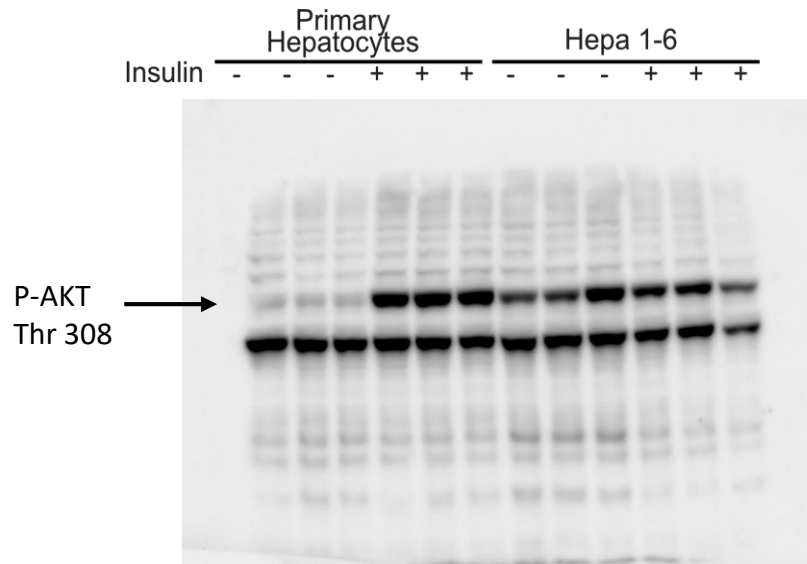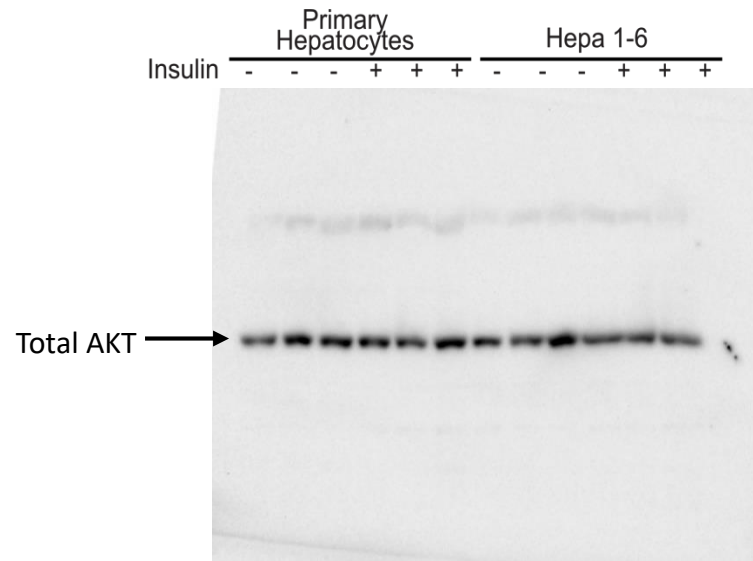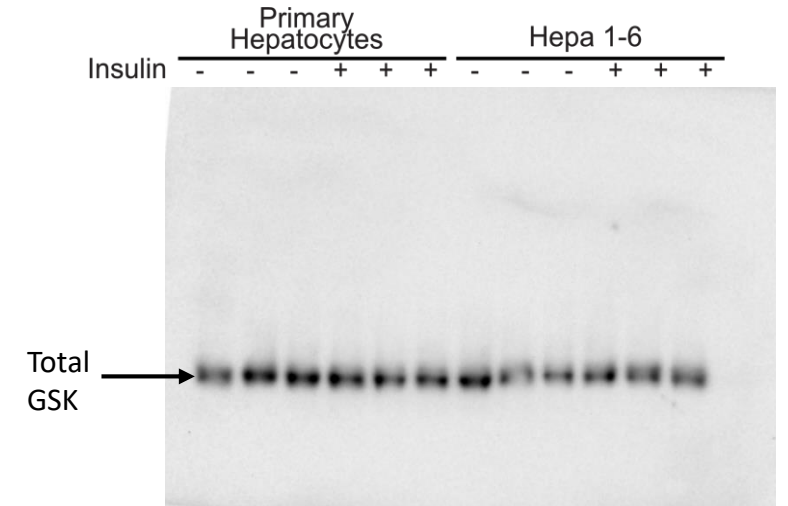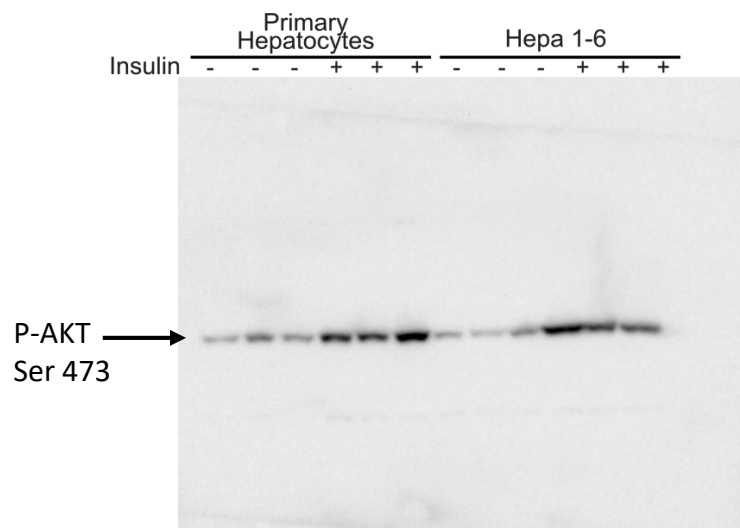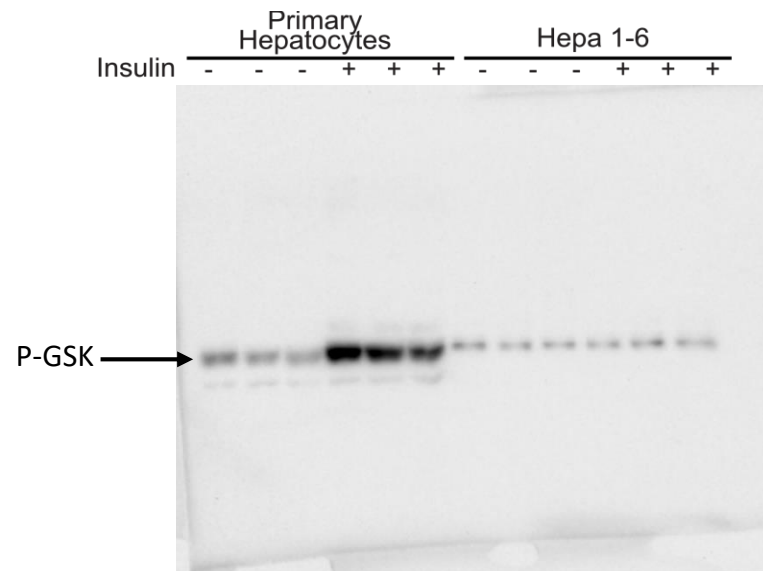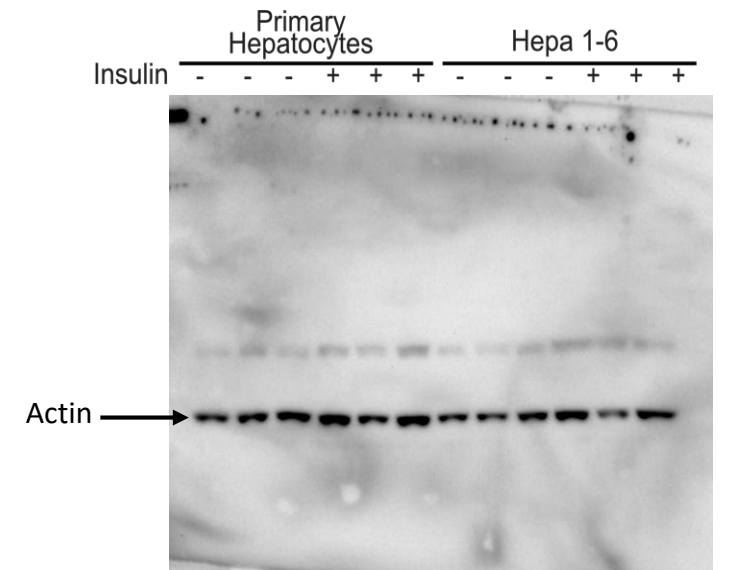

Figure 4A

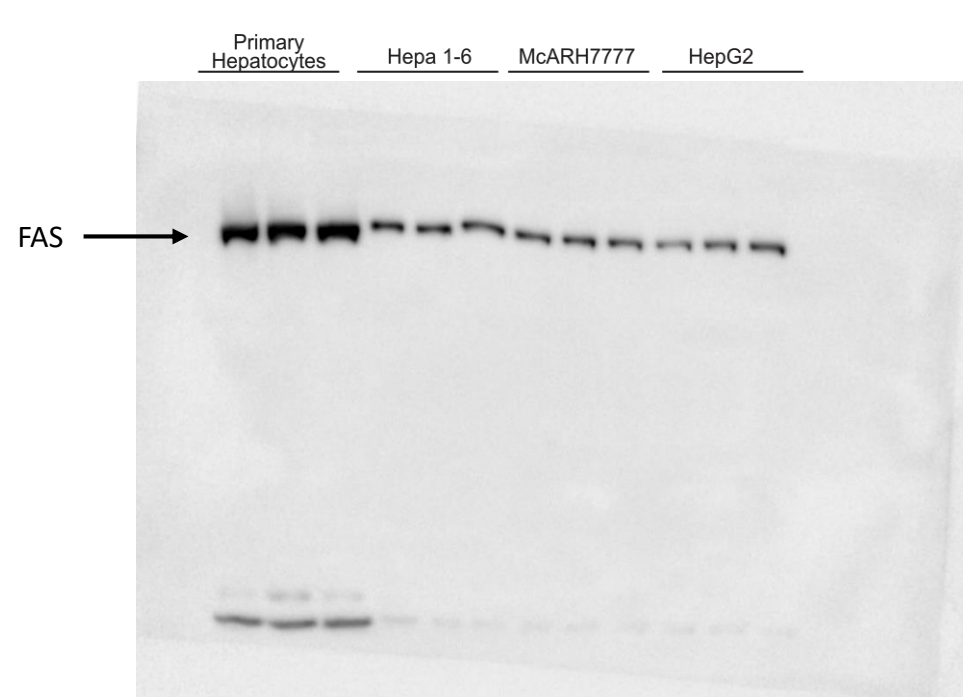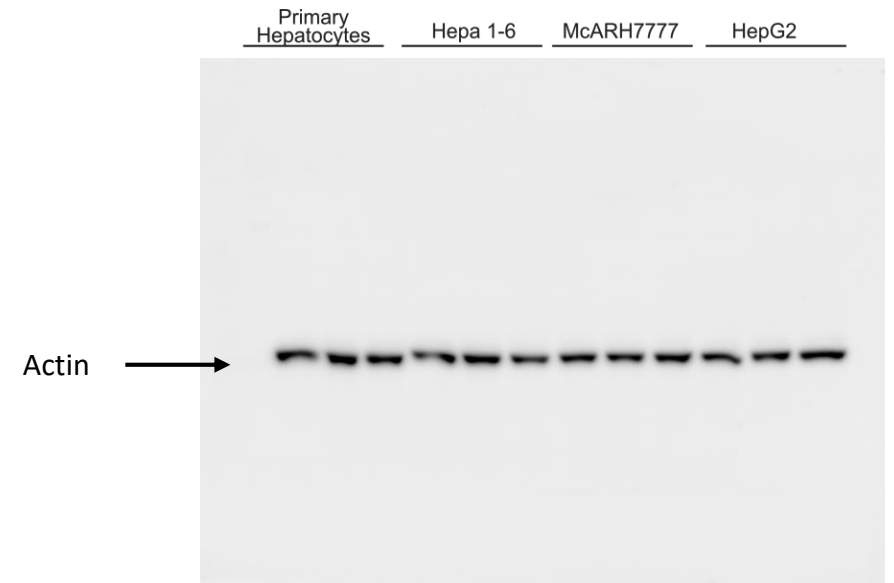

Figure S2A

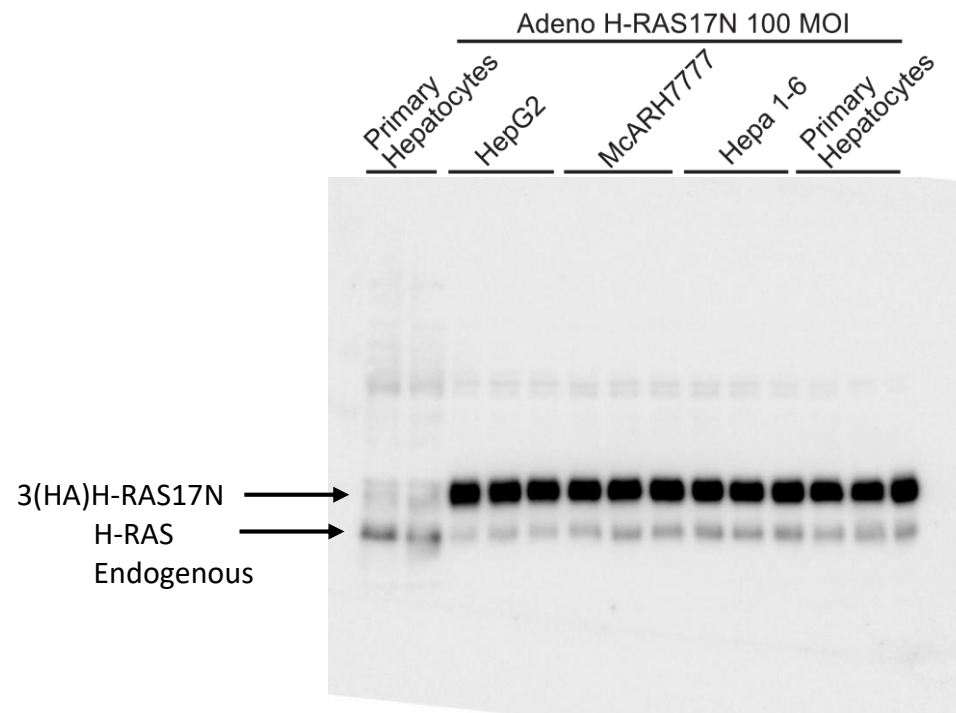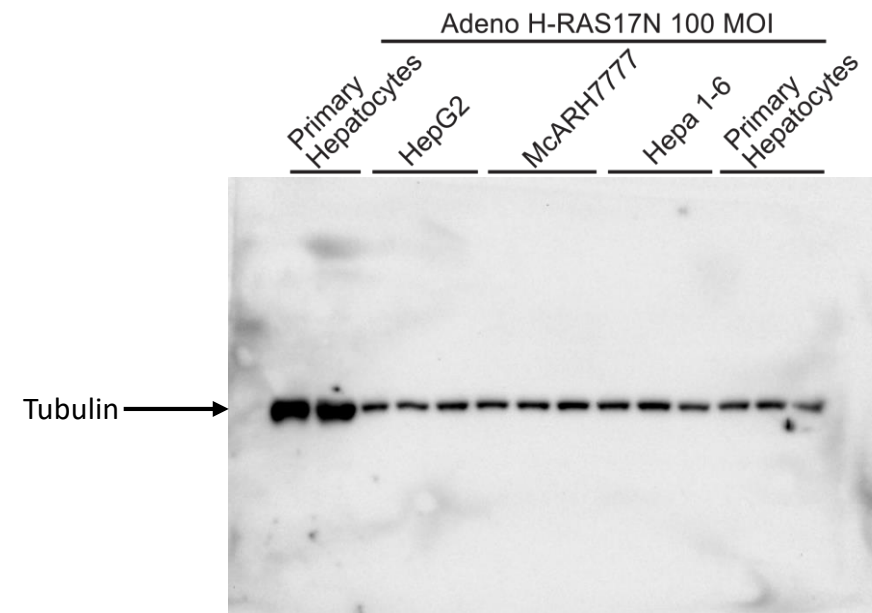



**Figure S3A**

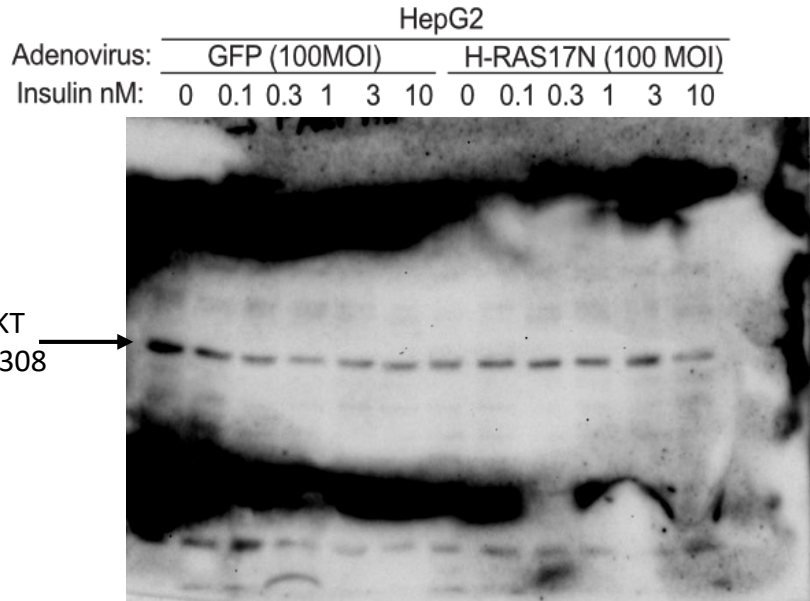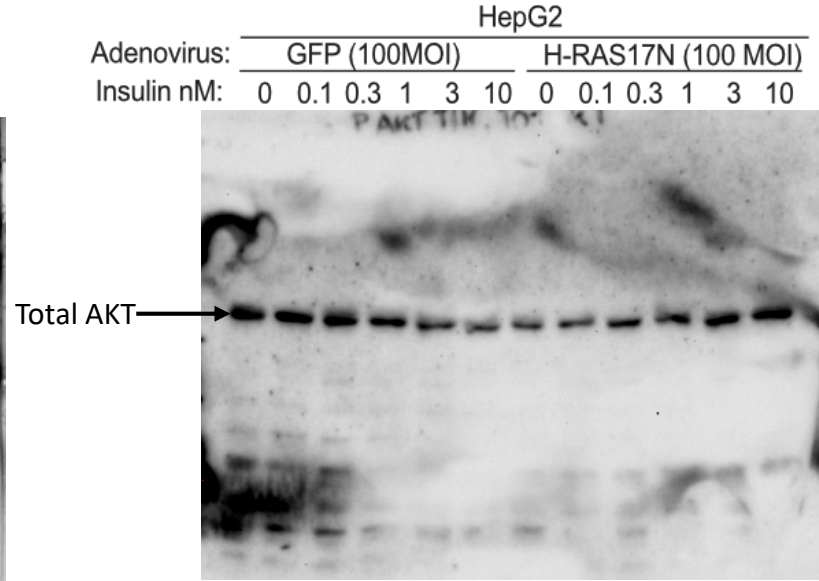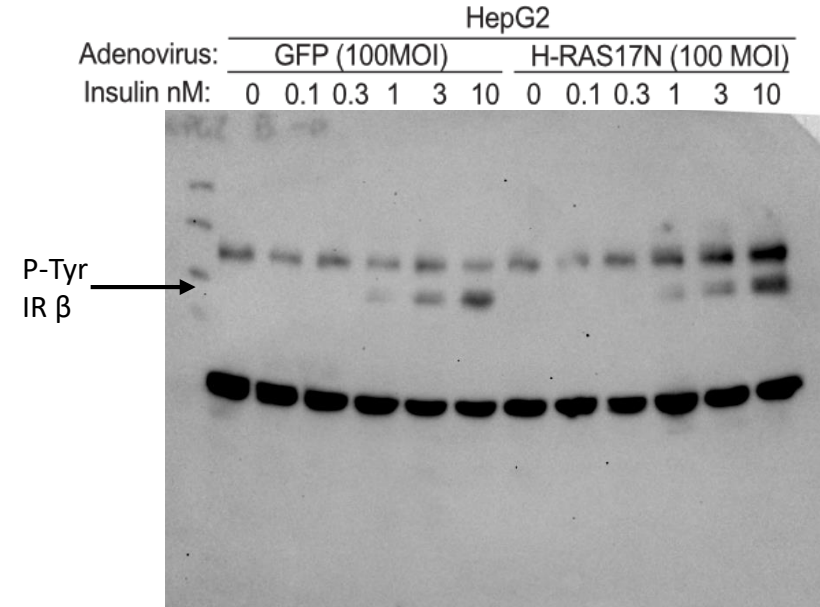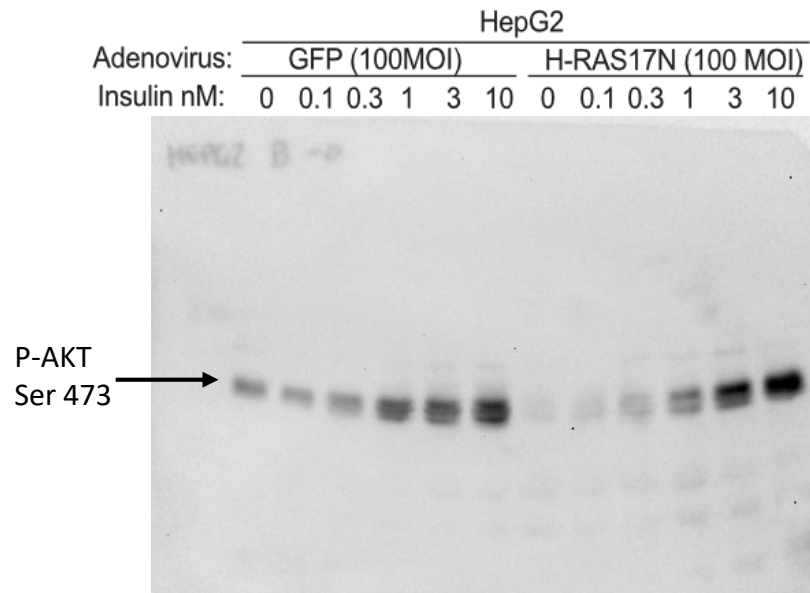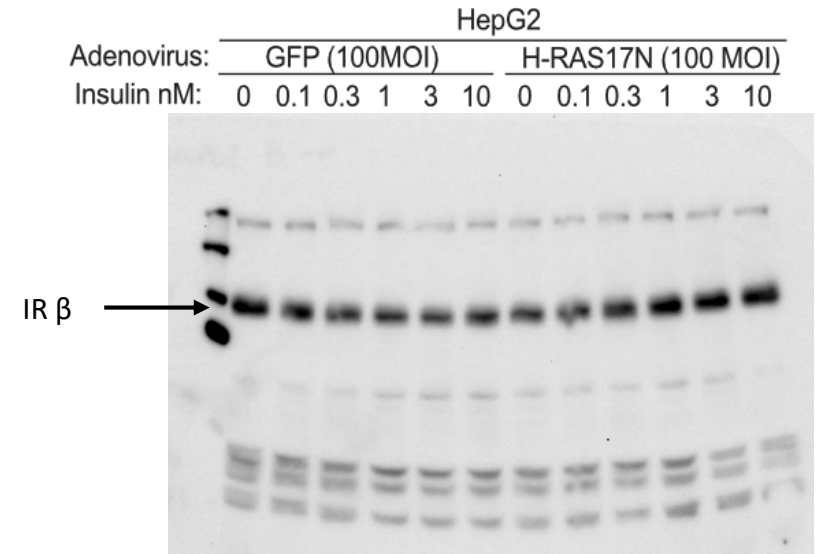

**Figure S3B**

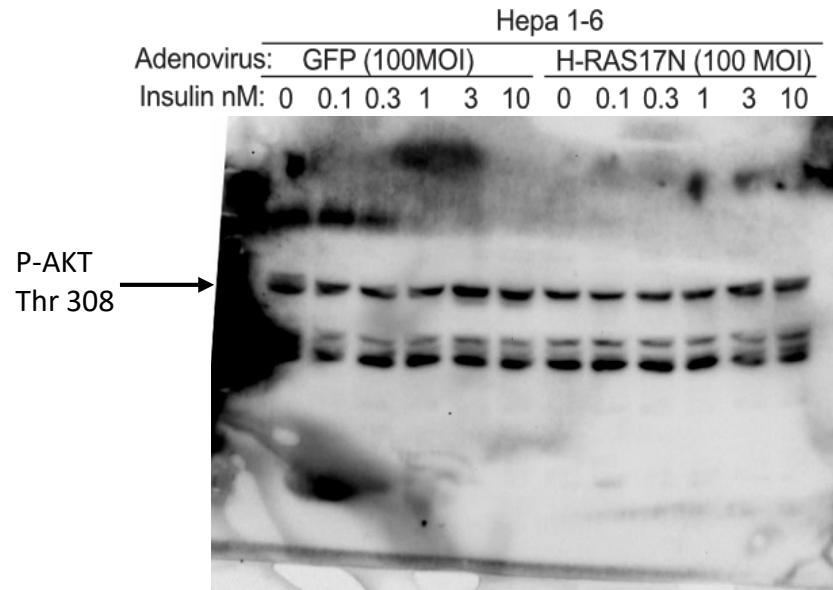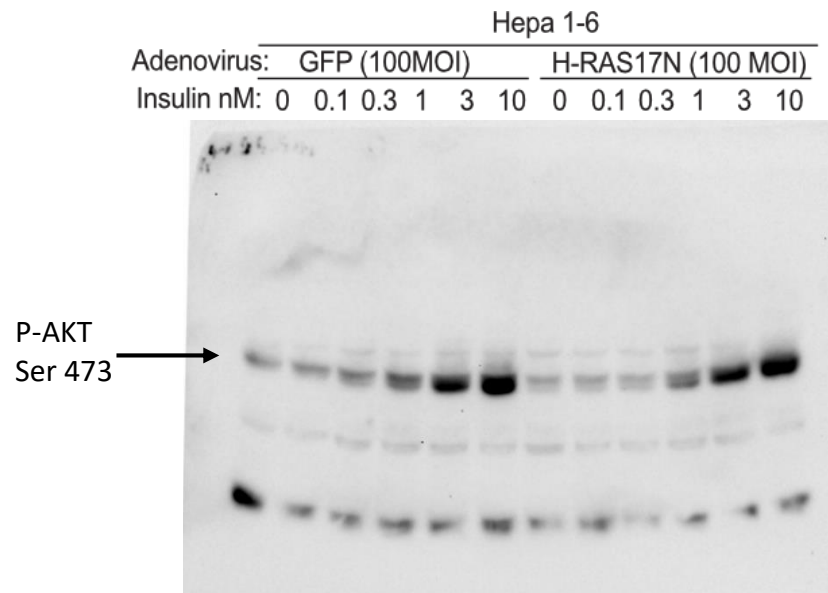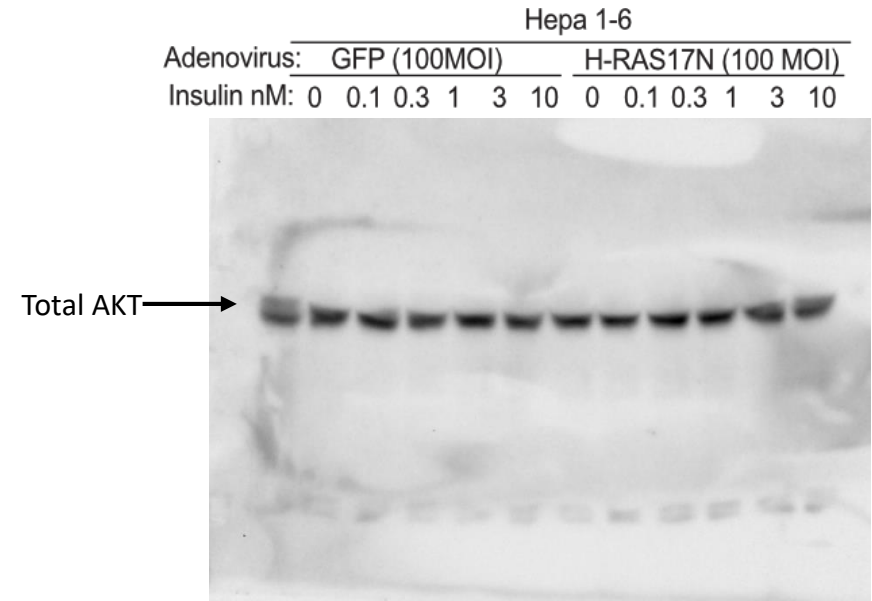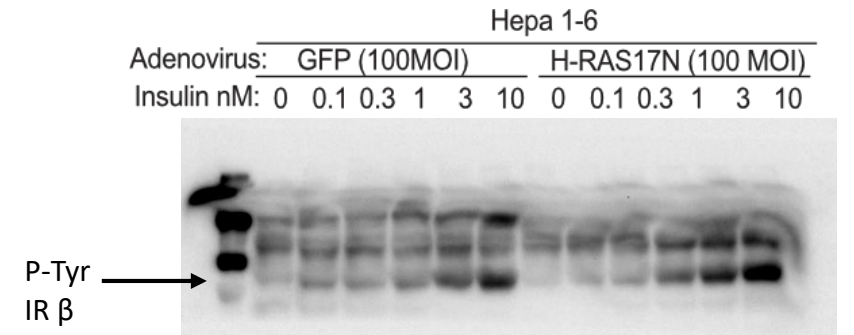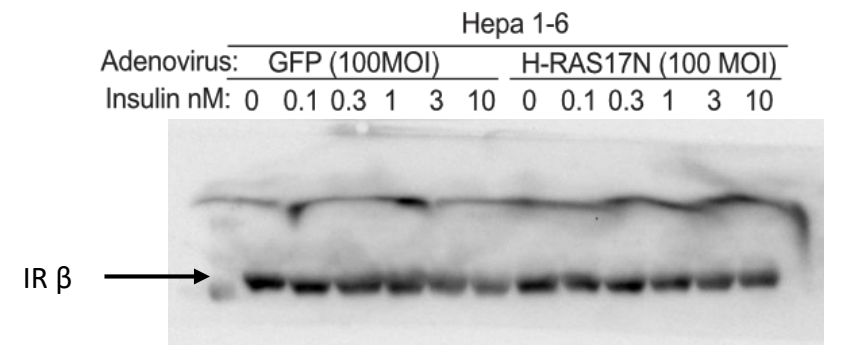

**Figure S3C**

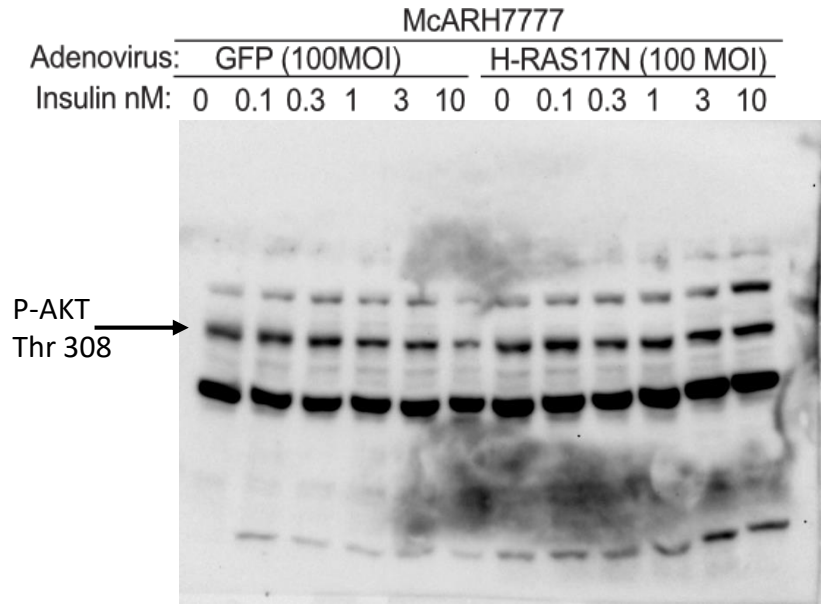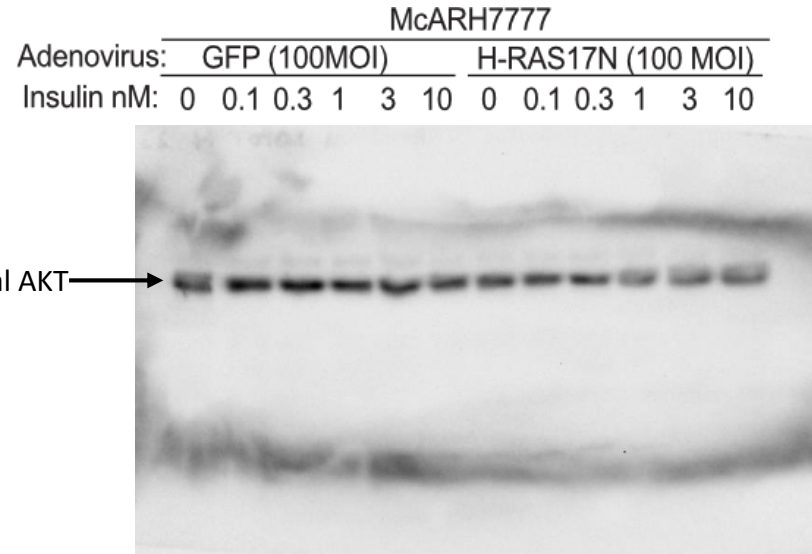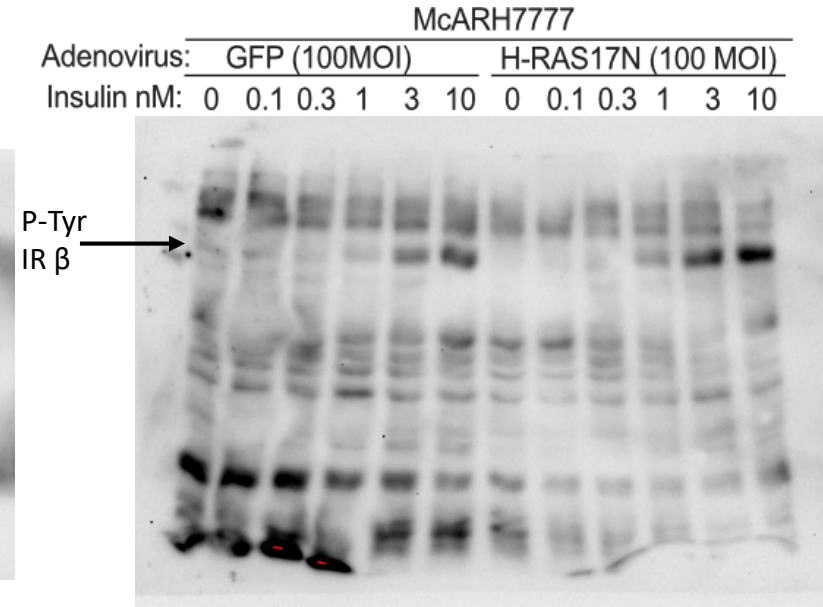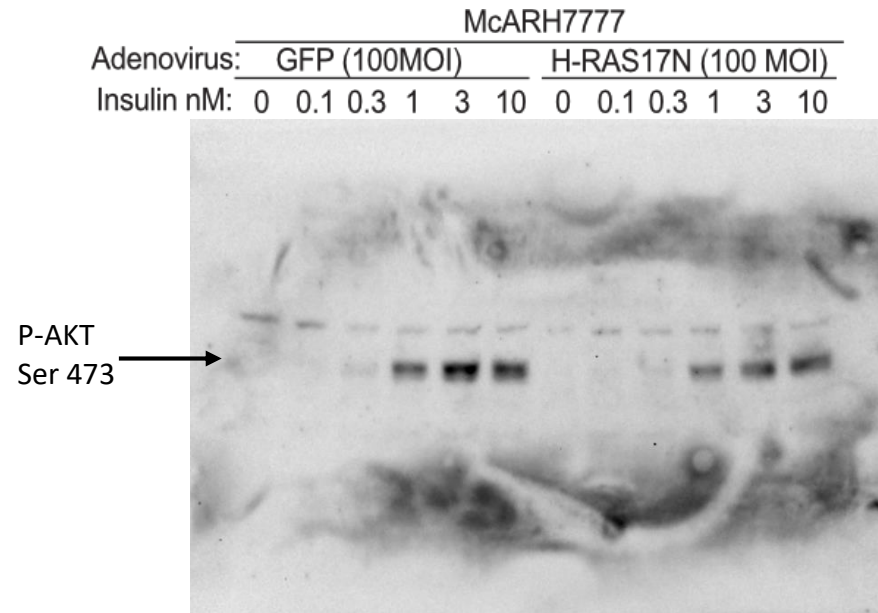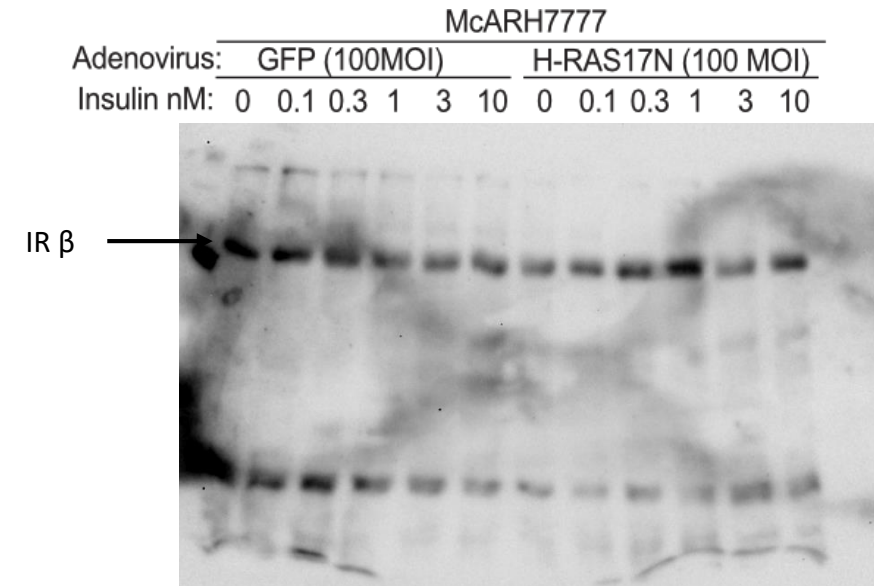

**Figure S4A**

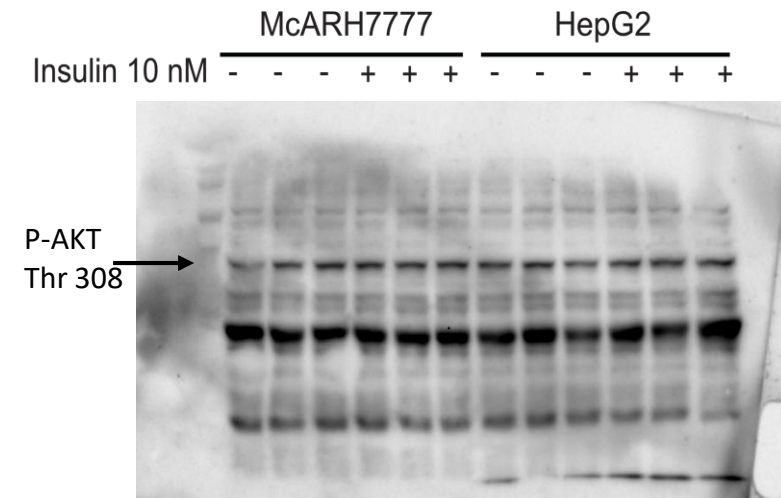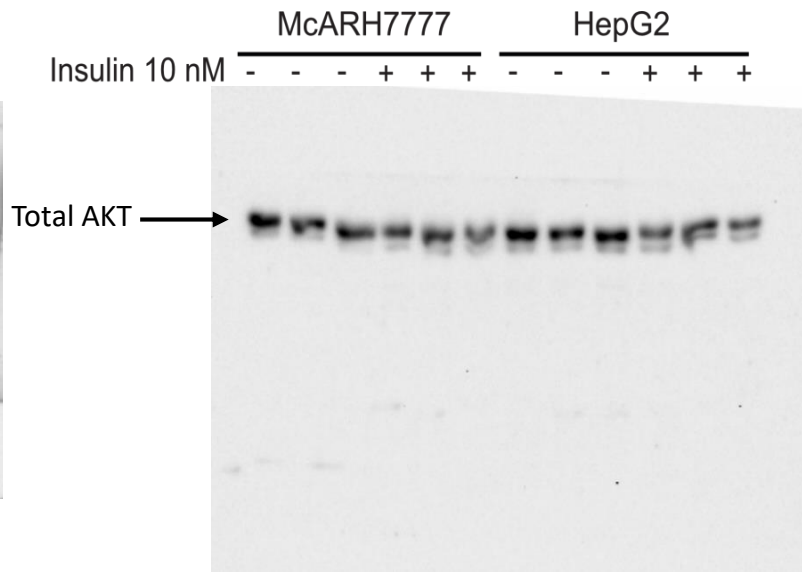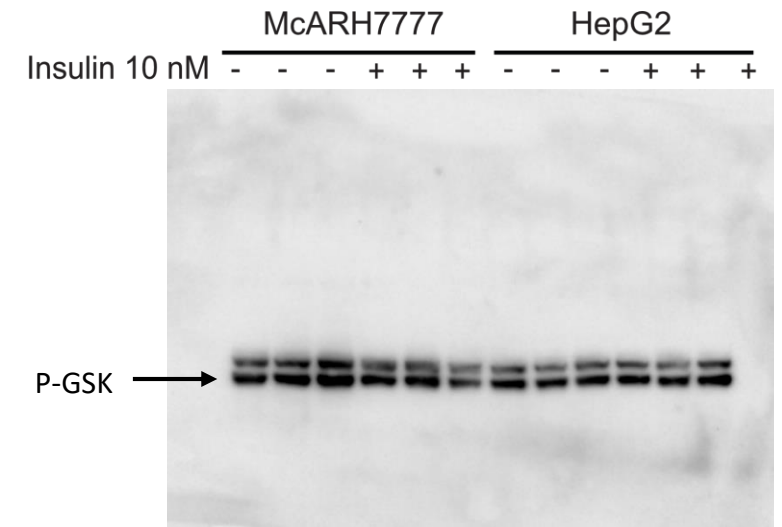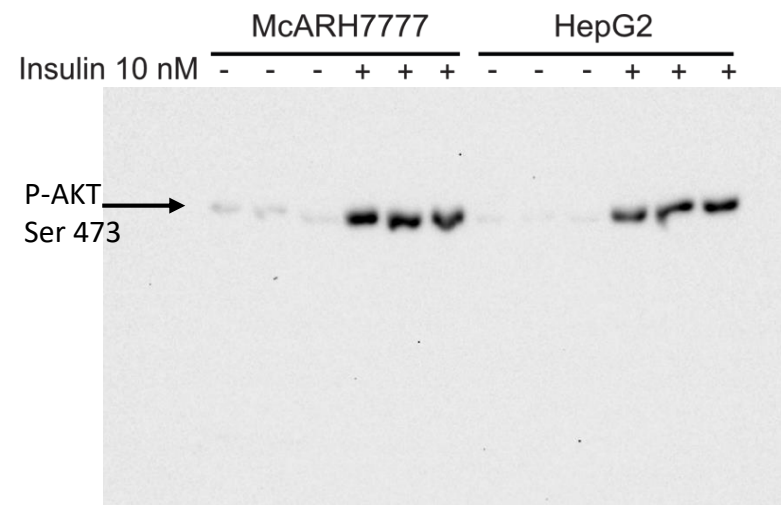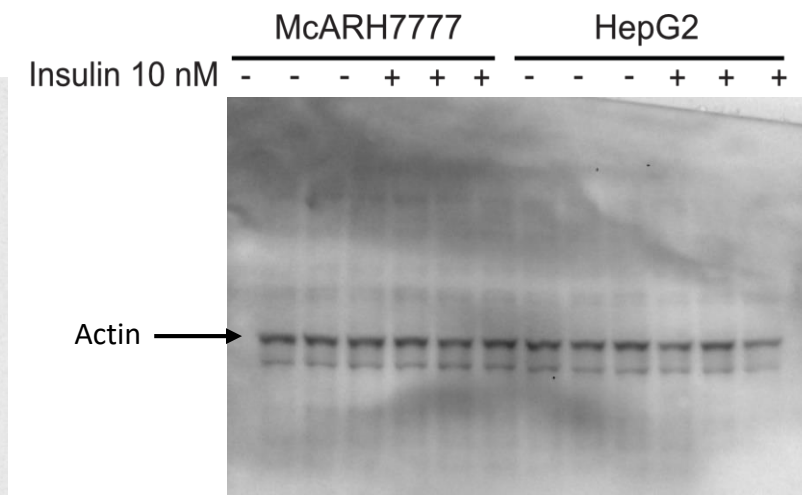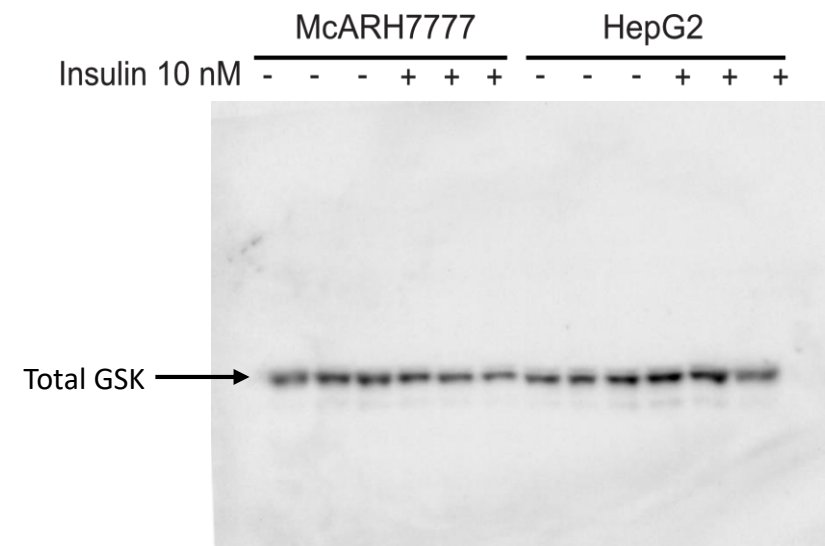



Figure S4C

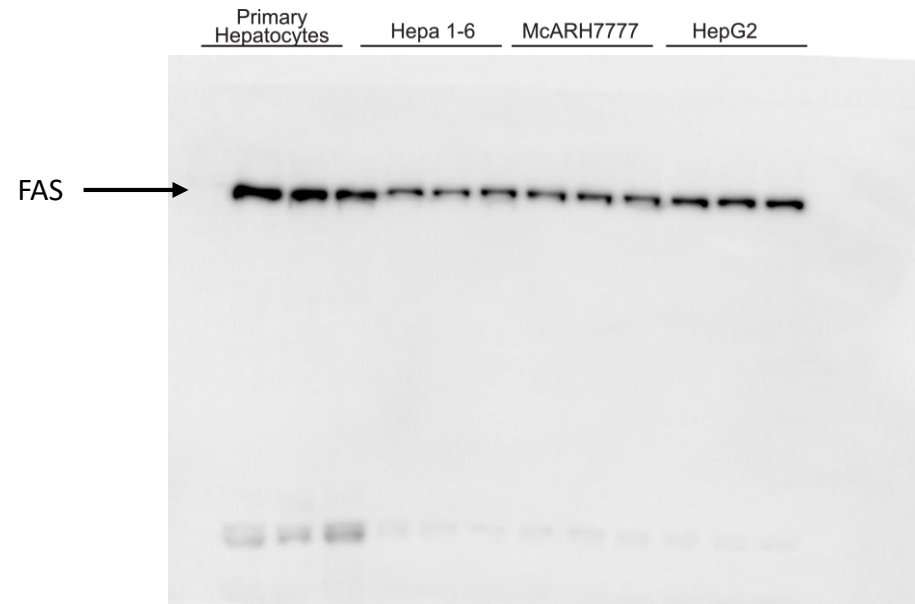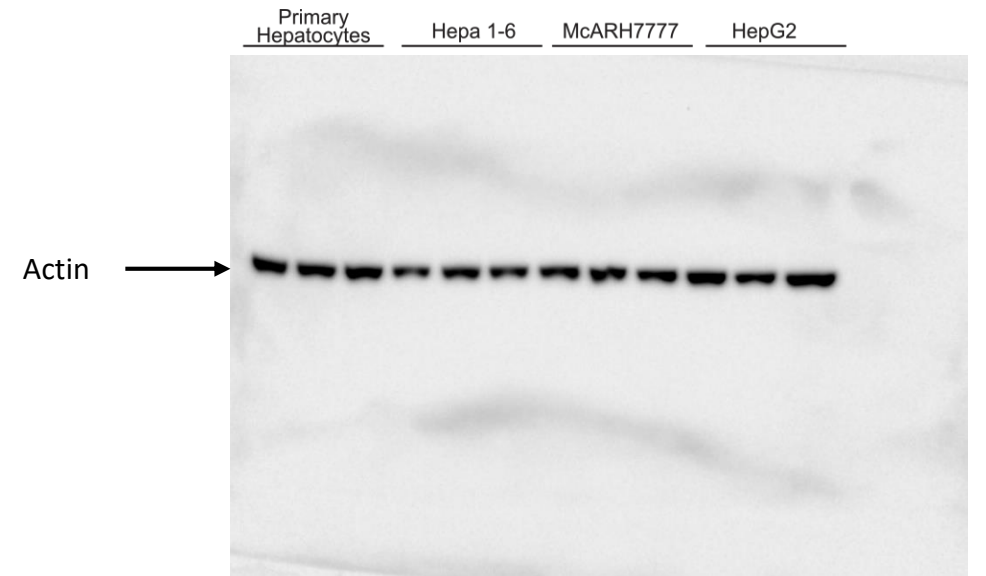

Figure S4D

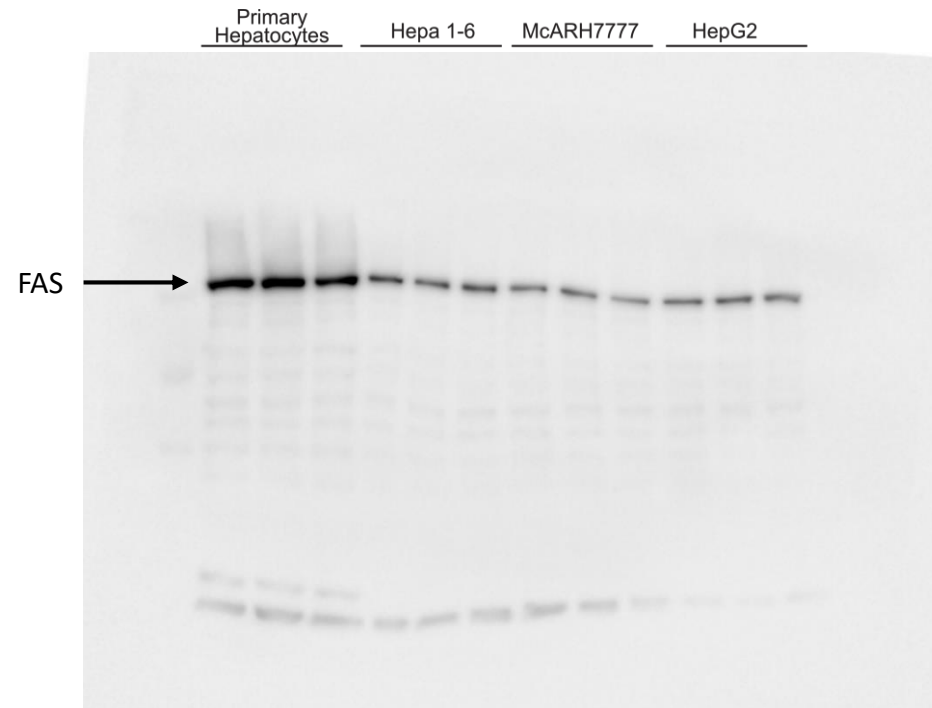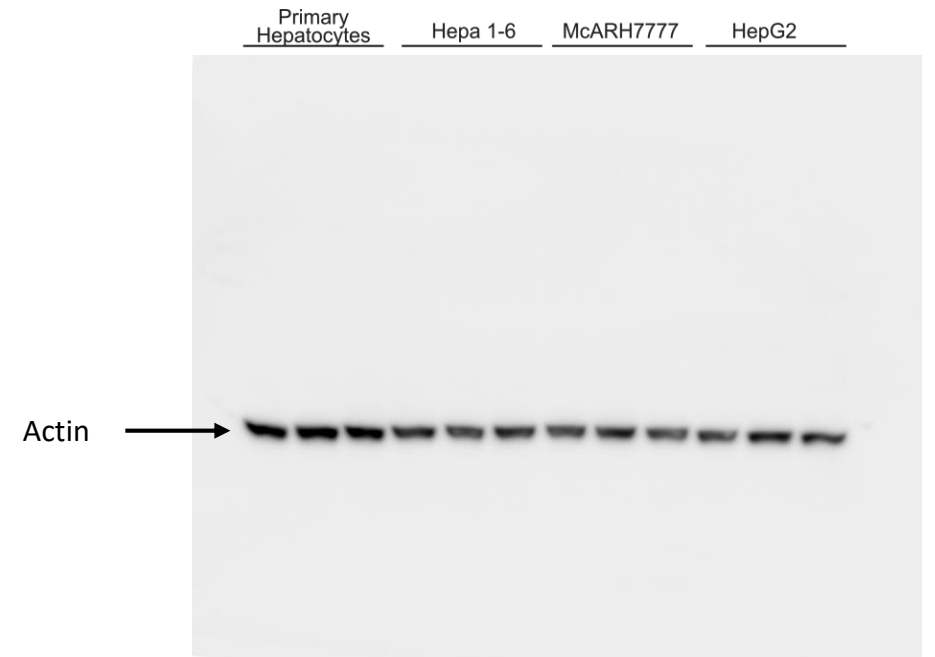

Supplement: 41598_2020_68721_MOESM2_ESM.pdf [file 41598_2020_68721_MOESM2_ESM.pdf]
