# Supplementary material for: Insulin signaling and glucose metabolism in different hepatoma cell lines deviate from hepatocyte physiology toward a convergent aberrant phenotype
Source: PubMed Central journal article supplement (PMC7374613; doi:10.1038/s41598-020-68721-9), 2020-07-21
Supplement: 41598_2020_68721_MOESM1_ESM.pdf [file 41598_2020_68721_MOESM1_ESM.pdf]

# **Insulin Signaling and Glucose Metabolism in Different Hepatoma Cell Lines Deviate from Hepatocyte Physiology Toward a Convergent Aberrant Phenotype**

Angela Molinaro<sup>1</sup>, Barbara Becattini<sup>1</sup>, Giovanni Solinas<sup>1\*</sup>

1) The Wallenberg Laboratory and Sahlgrenska Center for Cardiovascular and Metabolic Research, Department of Molecular and Clinical Medicine, Institute of Medicine, University of Gothenburg, Gothenburg, Sweden.

\* Corresponding author. E-mail: [Giovanni.Solinas@wlab.gu.se](mailto:Giovanni.Solinas@wlab.gu.se)

**Supplementary Figures S1-S4.**

## Supplementary Figure 1

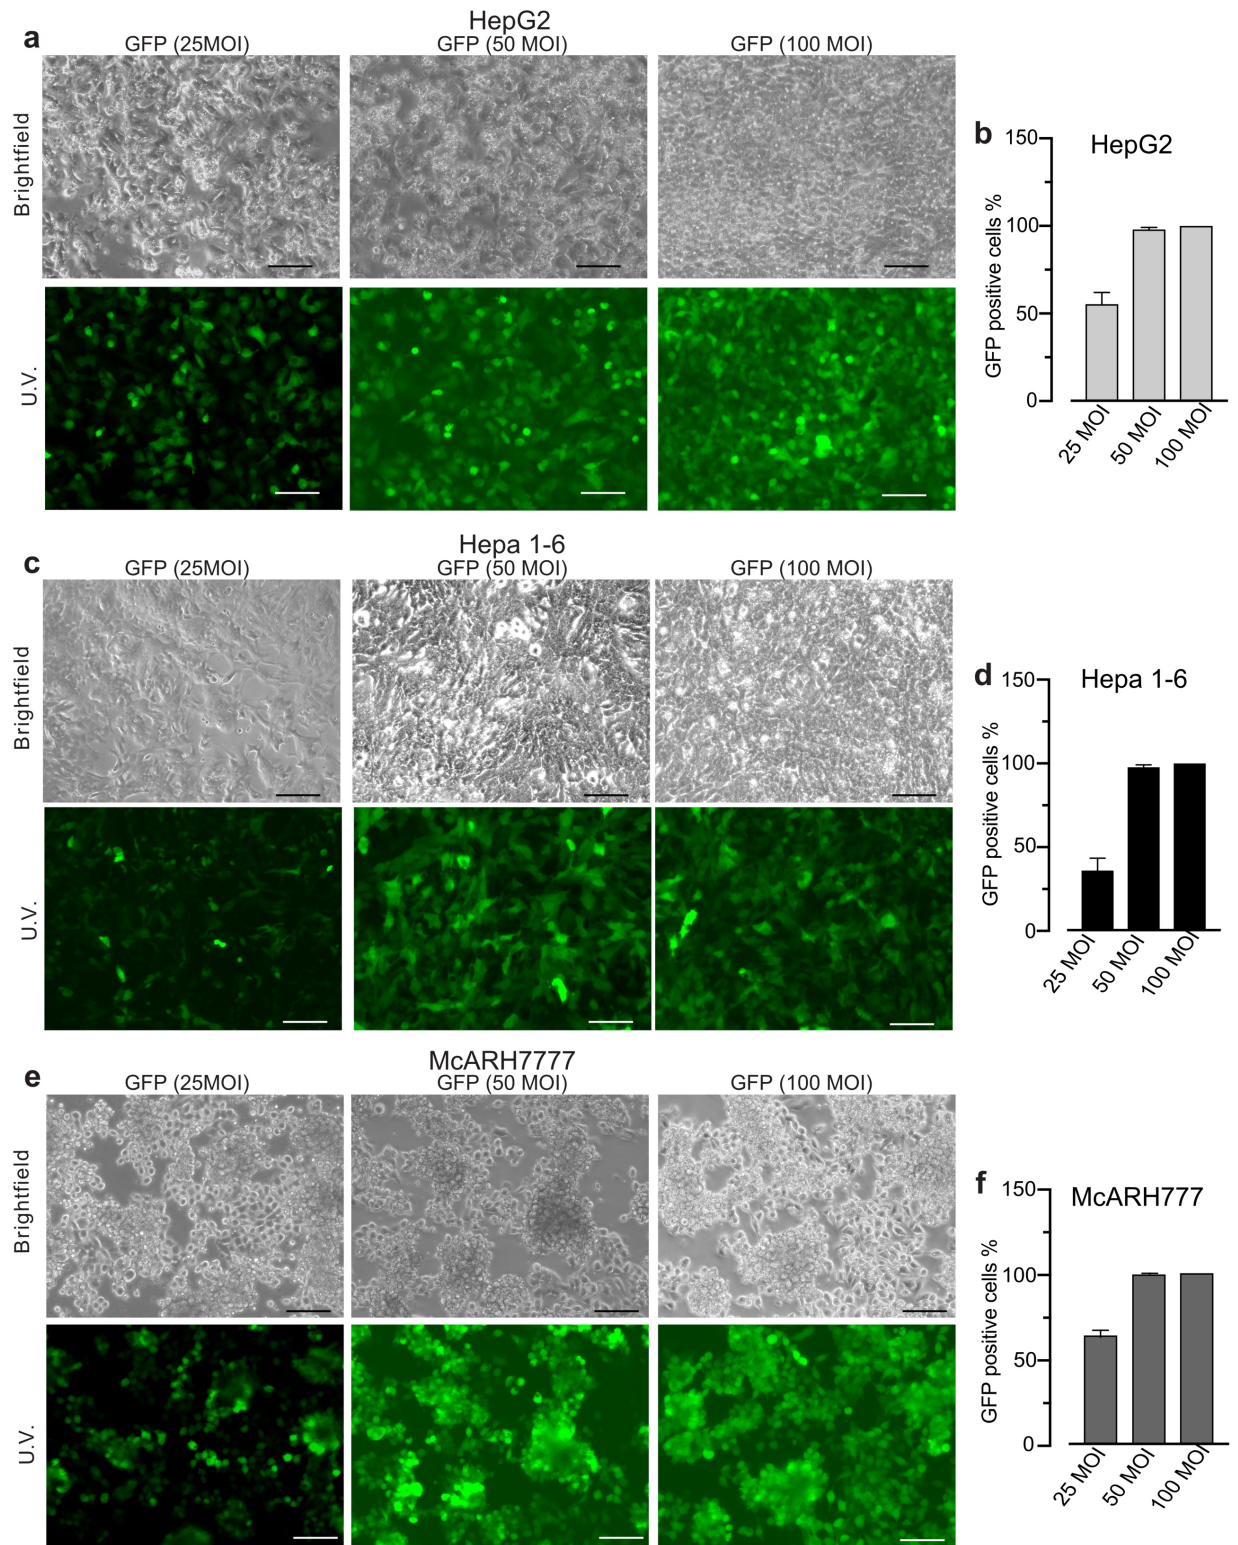

**Supplementary Figure 1.** Adenoviruses efficiency of infection. (a) Brightfield and U.V. fluorescence images of HepG2 infected with different MOI of a recombinant adenovirus expressing the GFP protein. (b) Quantification of GFP positive cells in (a). (c) Brightfield and U.V. fluorescence images of mouse Hepa 1-6 infected with different MOI of a recombinant adenovirus expressing the GFP protein. (d) Quantification of GFP positive cells in (c). (e) Brightfield and U.V. fluorescence images of mouse McARH7777 infected with different MOI of a recombinant adenovirus expressing the GFP protein. (f) Quantification of GFP positive cells in (e). n=3 independent experiments. Data are represented as mean  $\pm$  SEM.

## Supplementary Figure 2

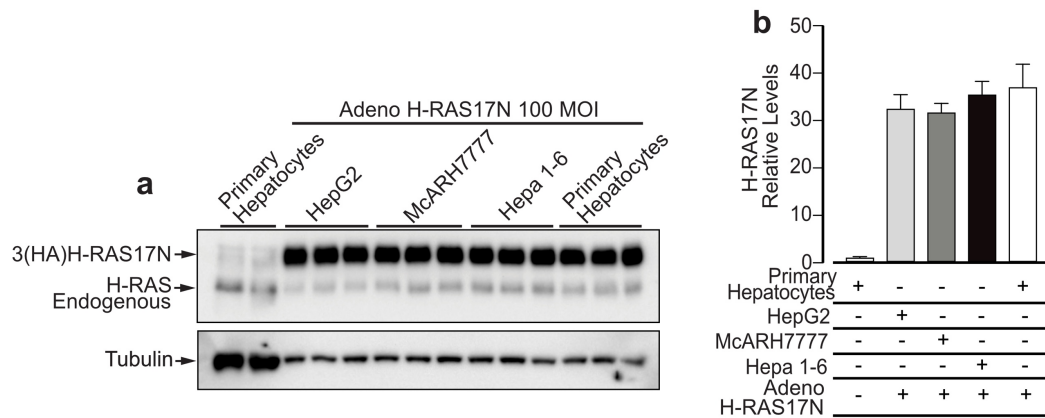

**Supplementary Figure 2.** Expression of HRAS17N in different hepatoma cell lines. **(a)** Immunoblot analysis of HRAS protein levels in primary hepatocytes not infected, and in HepG2, McARH7777, Hepa 1-6 and primary hepatocytes infected with 100 MOI of an adenovirus expressing the dominant negative RAS mutant H-RAS17N. **(b)** Quantification of (a).

n=2-3 biological replicates. n indicates biological replicates for primary hepatocytes, and independent experiments for cell lines. Data are represented as mean  $\pm$  SEM.

**Supplementary Figure 3**

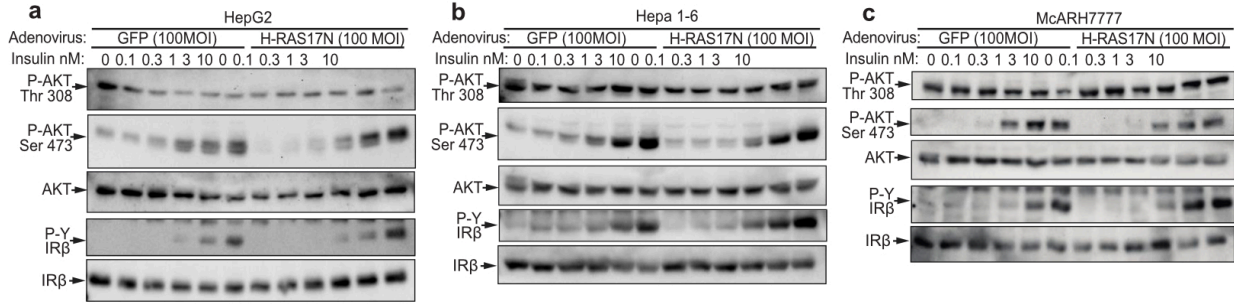

**Supplementary Figure 3.** Dose Response in the hepatoma cell lines. Immunoblot analysis of an insulin dose response for AKT and insulin receptor phosphorylation in (a) HepG2; (b) Hepa 1-6; and (c) McARH7777 hepatoma cell lines. Cells were stimulated for 8 min with increasing doses of insulin as indicated. For each cell lines 2-3 independent experiments were performed and representative blots are shown.

## Supplementary Figure 4

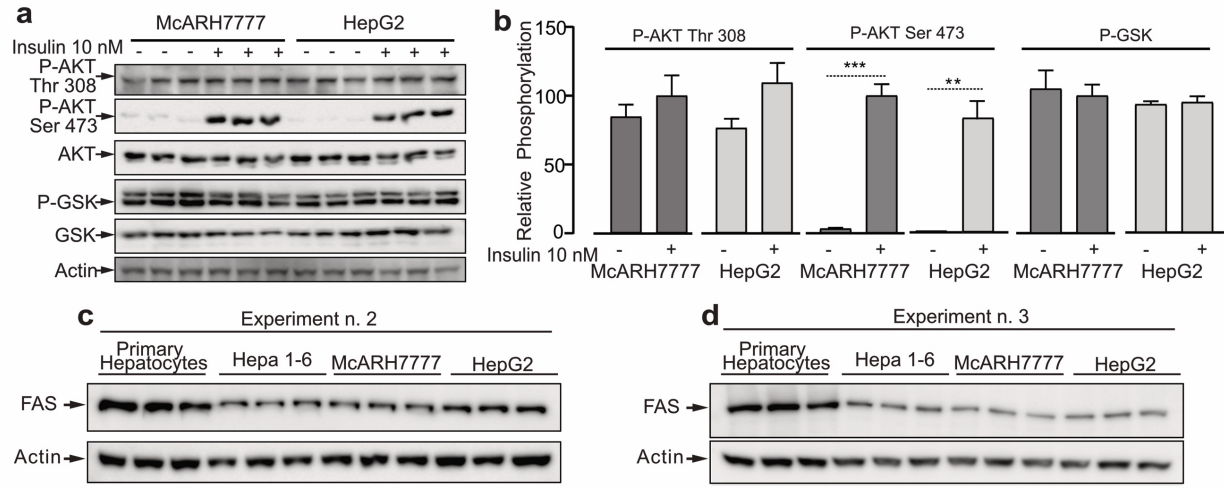

**Supplementary Figure 4.** McARH7777 and HepG2 display insulin unresponsive GSK phosphorylation. **(a)** Immunoblot analysis of insulin-driven Akt Thr 308 phosphorylation, Akt Ser 473 phosphorylation, and GSK3 $\beta$  phosphorylation in McARH7777 and HepG2 stimulated for 8 min with 10 nM insulin. **(b)** Quantification of blots in A. **(c)** Immunoblot analysis of FAS levels in primary hepatocytes, Hepa 1-6, McARH7777, and HepG2 (experiment n.2 related to Figure 4a, b). **(d)** Immunoblot analysis of FAS of experiment n.3 on primary hepatocytes, Hepa 1-6, McARH7777, and HepG2 (experiment n.3 related to Figure 4a, b). n=3 replicates per experiments.
